# Supplementary material for: Population genomics reveals the origin and asexual evolution of human infective trypanosomes
Source: PubMed Central journal article supplement (PMC4739771; doi:10.7554/elife.11473), 2016-01-26
Supplement: elife-11473-supp1.pdf [file elife-11473-supp1.pdf]

Supplementary File 1. Isolates used in this study

## *T.b. gambiense* Group 1

| ID | Sample ID    | Also known as...    | Year | Host | Country       | Locality     | BIIT test | TgSGP PCR | SRA |
|----|--------------|---------------------|------|------|---------------|--------------|-----------|-----------|-----|
| 1  | BIM_1        | MHOM/CM/75/BIM      | 1975 | man  | Cameroon      | Campo        | HSR       | +         | -   |
| 2  | MOS          | MHOM/CM/74/MOS      | 1974 | man  | Cameroon      | Mbam         | HSR       | +         | -   |
| 3  | B4_4163P     |                     | 2004 | man  | Côte d'Ivoire | Bonon        | HSR       | +         | -   |
| 4  | B4_F303P     |                     | 2004 | man  | Côte d'Ivoire | Bonon        | HSR       | +         | -   |
| 5  | B4_G2P       |                     | 2004 | man  | Côte d'Ivoire | Bonon        | HSR       | +         | -   |
| 6  | B4_I314P     |                     | 2004 | man  | Côte d'Ivoire | Bonon        | HSR       | +         | -   |
| 7  | CB5_1        |                     | 2002 | man  | Côte d'Ivoire | Bonon        | HSR       | +         | -   |
| 8  | S1_1_6R      |                     | 2002 | man  | Côte d'Ivoire | Bonon        | HSR       | +         | -   |
| 9  | S14_5_1      | MHOM/CI/02/S14/5/1  | 2002 | man  | Côte d'Ivoire | Bonon        | HSR       | +         | -   |
| 10 | S15_1_KIVI   |                     | 2002 | man  | Côte d'Ivoire | Bonon        | HSR       | +         | -   |
| 11 | S27_16_13    |                     | 2000 | man  | Côte d'Ivoire | Bonon        | HSR       | +         | -   |
| 12 | S27_2_6      |                     | 2000 | man  | Côte d'Ivoire | Bonon        | HSR       | +         | -   |
| 13 | S3_4_1       |                     | 2000 | man  | Côte d'Ivoire | Bonon        | HSR       | +         | -   |
| 14 | S7_2_2       |                     | 2002 | man  | Côte d'Ivoire | Bonon        | HSR       | +         | -   |
| 15 | T33_1_7_KIVI |                     | 2000 | man  | Côte d'Ivoire | Bonon        | HSR       | +         | -   |
| 16 | T66_4_2      |                     | 2000 | man  | Côte d'Ivoire | Bonon        | HSR       | +         | -   |
| 17 | DEOLA        | MHOM/CI/84/DAL629   | 1984 | man  | Côte d'Ivoire | Daloa        | HSR       | +         | -   |
| 18 | ISTI         | MHOM/CI/83/DAL607   | 1983 | man  | Côte d'Ivoire | Daloa        | HSR       | +         | -   |
| 19 | LIGO         | MHOM/CI/84/DAL655   | 1984 | man  | Côte d'Ivoire | Daloa        | HSR       | +         | -   |
| 20 | LISA         | MHOM/CI/83/DAL642   | 1983 | man  | Côte d'Ivoire | Daloa        | HSR       | +         | -   |
| 21 | SAKON        | MHOM/CI/83/DAL403   | 1983 | man  | Côte d'Ivoire | Daloa        | HSR       | +         | -   |
| 22 | SEVAL        | MHOM/CI/84/DAL633   | 1984 | man  | Côte d'Ivoire | Daloa        | HSR       | +         | -   |
| 23 | TOBO         | DAL596              | 1983 | man  | Côte d'Ivoire | Daloa        | HSR       | +         | -   |
| 24 | ZENOU        | MHOM/CI/83/DAL625   | 1983 | man  | Côte d'Ivoire | Daloa        | HSR       | +         | -   |
| 25 | KIDE         | MHOM/CI/83/DAL595   | 1983 | man  | Côte d'Ivoire | Gagnoa       | HSR       | +         | -   |
| 26 | T21_4A       |                     | 1999 | man  | Côte d'Ivoire | Grand-Zathry | HSR       | +         | -   |
| 27 | B7_2         |                     | 2001 | man  | Côte d'Ivoire | Oumé         | HSR       | +         | -   |
| 28 | N1317_2_KIVI |                     | 2001 | man  | Côte d'Ivoire | Oumé         | HSR       | +         | -   |
| 29 | T4_2_KIVI    |                     | 2001 | man  | Côte d'Ivoire | Oumé         | HSR       | +         | -   |
| 30 | AMAN_KIVI    |                     | 2001 | man  | Côte d'Ivoire | Oumé         | HSR       | +         | -   |
| 31 | CP1_2_KIVI   |                     | 2001 | man  | Côte d'Ivoire | Oumé         | HSR       | +         | -   |
| 32 | YAD          |                     | 1998 | man  | Côte d'Ivoire | Sinfra       | HSR       | +         | -   |
| 33 | N2561        |                     | 1997 | man  | Côte d'Ivoire | Sinfra       | HSR       | +         | -   |
| 34 | ELIANE       | MHOM/CI/58/ELIANE   | 1952 | man  | Côte d'Ivoire | Unknown      | HSR       | +         | -   |
| 35 | ABTOR        | MHOM/CI/83/DAL543   | 1983 | man  | Côte d'Ivoire | Vavoua       | HSR       | +         | -   |
| 36 | ADZAM        | MHOM/CI/83/DAL542   | 1983 | man  | Côte d'Ivoire | Vavoua       | HSR       | +         | -   |
| 37 | BRAZO        | MHOM/CI/84/DAL740   | 1984 | man  | Côte d'Ivoire | Vavoua       | HSR       | +         | -   |
| 38 | SETRA        | MHOM/CI/79/THDAL083 | 1979 | man  | Côte d'Ivoire | Vavoua       | HSR       | +         | -   |
| 39 | DOB112_KIVI  |                     | 2002 | man  | Guinea        | Boffa        | HSR       | +         | -   |
| 40 | DOB7_1       |                     | 2002 | man  | Guinea        | Boffa        | HSR       | +         | -   |
| 41 | LAB13_5      |                     | 2002 | man  | Guinea        | Boffa        | HSR       | +         | -   |
| 42 | LAB15_2      |                     | 2002 | man  | Guinea        | Boffa        | HSR       | +         | -   |
| 43 | LAB27_4      |                     | 2002 | man  | Guinea        | Boffa        | HSR       | +         | -   |
| 44 | LAC11_1      |                     | 2002 | man  | Guinea        | Boffa        | HSR       | +         | -   |

|    | <b>Sample ID</b> | <b>Also known as...</b> | <b>Year</b> | <b>Host</b> | <b>Country</b> | <b>Locality</b> | <b>BIIT test</b> | <b>TgSGP PCR</b> | <b>SRA</b> |
|----|------------------|-------------------------|-------------|-------------|----------------|-----------------|------------------|------------------|------------|
| 45 | LAC14_3          |                         | 2002        | man         | Guinea         | Boffa           | HSR +            | -                |            |
| 46 | LAC22_11         |                         | 2002        | man         | Guinea         | Boffa           | HSR +            | -                |            |
| 47 | SAC23_3          |                         | 2002        | man         | Guinea         | Boffa           | HSR +            | -                |            |
| 48 | TH1_29_7         |                         | 2002        | man         | Guinea         | Boffa           | HSR +            | -                |            |
| 49 | WAB18_23         |                         | 2002        | man         | Guinea         | Boffa           | HSR +            | -                |            |
| 50 | WAB22_6          |                         | 2002        | man         | Guinea         | Boffa           | HSR +            | -                |            |
| 51 | WAB6_1           |                         | 2002        | man         | Guinea         | Boffa           | HSR +            | -                |            |
| 52 | YEMB3_7          |                         | 2002        | man         | Guinea         | Boffa           | HSR +            | -                |            |
| 53 | LAC22_10         |                         | 2002        | man         | Guinea         | Boffa           | HSR +            | -                |            |
| 54 | SAC1_2           |                         | 2002        | man         | Guinea         | Boffa           | HSR +            | -                |            |
| 55 | YEMB41_2         |                         | 2002        | man         | Guinea         | Boffa           | HSR +            | -                |            |
| 56 | YENB17_4         |                         | 2002        | man         | Guinea         | Boffa           | HSR +            | -                |            |
| 57 | B13_9            |                         | 1998        | man         | Guinea         | Dubreka         | HSR +            | -                |            |
| 58 | B15_7            |                         | 1998        | man         | Guinea         | Dubreka         | HSR +            | -                |            |
| 59 | B34_2            |                         | 1998        | man         | Guinea         | Dubreka         | HSR +            | -                |            |
| 60 | B5_2             |                         | 1998        | man         | Guinea         | Dubreka         | HSR +            | -                |            |
| 61 | F10_5            |                         | 1998        | man         | Guinea         | Dubreka         | HSR +            | -                |            |
| 62 | F12_20           |                         | 1998        | man         | Guinea         | Dubreka         | HSR +            | -                |            |
| 63 | F31_4            |                         | 1998        | man         | Guinea         | Dubreka         | HSR +            | -                |            |
| 64 | F34_1            |                         | 1998        | man         | Guinea         | Dubreka         | HSR +            | -                |            |
| 65 | F35_2            |                         | 1998        | man         | Guinea         | Dubreka         | HSR +            | -                |            |
| 66 | F4_1             |                         | 1998        | man         | Guinea         | Dubreka         | HSR +            | -                |            |
| 67 | F55_3            |                         | 1998        | man         | Guinea         | Dubreka         | HSR +            | -                |            |
| 68 | F7_6             |                         | 1998        | man         | Guinea         | Dubreka         | HSR +            | -                |            |
| 69 | KAC4_10          |                         | 2002        | man         | Guinea         | Dubreka         | HSR +            | -                |            |
| 70 | KHOB34_1         |                         | 2002        | man         | Guinea         | Dubreka         | HSR +            | -                |            |
| 71 | N4ANNEE_13_KIVI  |                         | 2002        | man         | Guinea         | Dubreka         | HSR +            | -                |            |
| 72 | N70_2            |                         | 1998        | man         | Guinea         | Dubreka         | HSR +            | -                |            |
| 73 | BROB7_16_KIVI    |                         | 2002        | man         | Guinea         | Dubreka         | HSR +            | -                |            |
| 74 | F2_1             |                         | 1998        | man         | Guinea         | Dubreka         | HSR +            | -                |            |
| 75 | KEMB9_5          |                         | 2002        | man         | Guinea         | Dubreka         | HSR +            | -                |            |

## *T.b. gambiense* Group 2

| ID | Sample ID | Also known as...    | Year | Host | Country       | Locus     | BIIT test | TgSGP PCR | SRA |
|----|-----------|---------------------|------|------|---------------|-----------|-----------|-----------|-----|
| 76 | TSW33     |                     | 1982 | man  | Côte d'Ivoire | Bouafle   | VHSR      | -         | -   |
| 77 | KOBIR     | MHOM/CI/82/DAL503   | 1982 | man  | Côte d'Ivoire | Daloa     | VHSR      | -         | -   |
| 78 | OUSOU     | MHOM/CI/82/THDAL494 | 1982 | man  | Côte d'Ivoire | Daloa     | VHSR      | -         | -   |
| 79 | TB386     | MHOM/CI/78/TH114    | 1978 | man  | Côte d'Ivoire | Koudougou | VHSR      | -         | -   |

## *T.b. rhodesiense*

|    | Sample ID | Also known as... | Year | Host | Country  | Locus    | BIIT test | TgSGP PCR | SRA |
|----|-----------|------------------|------|------|----------|----------|-----------|-----------|-----|
| 80 | K975      |                  | 1970 | Fly  | Kenya    | Kiboko   | VHSR      | -         | +   |
| 81 | N1052     |                  | 1961 | man  | Kenya    | Nyanza   | VHSR      | -         | +   |
| 82 | GYBO      |                  | 1984 | man  | Tanzania | Tanzania | VHSR      | -         | +   |
| 83 | Z210      |                  | 1982 | man  | Zambia   | Luangwa  | VHSR      | -         | +   |

## *T.b. brucei*

|    | Sample ID | Also known as... | Year | Host       | Country  | Locus     | BIIT test | TgSGP PCR | SRA |
|----|-----------|------------------|------|------------|----------|-----------|-----------|-----------|-----|
| 84 | TB927     | TREU927/4        | 1969 | Fly        | Kenya    | Unknown   | - PCR     | -         | -   |
| 85 | TB247     | STIB247          | 1971 | Hartebeest | Tanzania | Serengeti | HSS       | -         | -   |

For each isolate, the year of isolation, host, country and location are given along with the results of the BIIT test (Blood Incubation Infectivity Test), which determines human infectivity. The presence/absence of *TgSGP*, the *T.b. gambiense* Group 1 human serum resistance gene and *SRA*, the *T.b. rhodesiense* human serum resistance gene are indicated. The majority of samples in this study were *T.b. gambiense* Group 1, details of which have been previously published<sup>2,46</sup>.
